# Supplementary material for: Single-molecule imaging of chromatin remodelers reveals role of ATPase in promoting fast kinetics of target search and dissociation from chromatin
Source: eLife. 2021 Jul 27;10:e69387. doi: 10.7554/eLife.69387 (PMC8352589; doi:10.7554/eLife.69387)
Supplement: Figure 1—source data 1. [file elife-69387-fig1-data1.xlsx]

## Sheet: Sheet1
Figure 1-source data 1. MSD-based kinetic analysis
Remodeler	Fbound (%)	Dbound (µm2s-1)	Dfree (µm2s-1)
RSC (Sth1)	66.6 ± 4.2	0.089 ± 0.006	0.595 ± 0.064
SWI/SNF (Snf2)	58.5 ± 7.7	0.097 ± 0.012	0.540 ± 0.076
INO80 (Ino80)	37.2 ± 11.2	0.100 ± 0.025	0.538 ± 0.076
ISW2 (Isw2)	26.9 ± 3.6	0.079 ± 0.011	0.671 ± 0.033
CHD1 (Chd1)	47.7 ± 4.0	0.079 ± 0.008	0.662 ± 0.051
ISW1a/b (Isw1)	47.1 ± 5.8	0.100 ± 0.013	0.709 ± 0.073
ISW1a (Ioc3)	40.1 ± 7.6	0.100 ± 0.023	0.789 ± 0.092
ISW1b (Ioc4)	59.5 ± 13.8	0.100 ± 0.027	0.581 ± 0.127
Histone H2B	84.3 ± 0.9	0.036 ± 0.001	0.735 ± 0.066
