# Supplementary material for: Single-molecule imaging of chromatin remodelers reveals role of ATPase in promoting fast kinetics of target search and dissociation from chromatin
Source: eLife. 2021 Jul 27;10:e69387. doi: 10.7554/eLife.69387 (PMC8352589; doi:10.7554/eLife.69387)
Supplement: Figure 3—source data 1. [file elife-69387-fig3-data1.xlsx]

## Sheet: Sheet1
Figure 3-source data 1. vbSPT analysis
Remodeler	Diffusion coefficients (µm2s-1)		State Occupancies		Transition Probabilities
	State 1 (“BOUND”)	State 2 (“FREE”)	State 1 (“BOUND”)	State 2 (“FREE”)	State 1 → State 2 “BOUND” → “FREE”	State 2 → State 1 “FREE” → “BOUND”
RSC (Sth1)	0.139	0.905	0.796	0.204	0.037	0.189
SWI/SNF (Snf2)	0.134	0.709	0.727	0.273	0.048	0.168
INO80 (Ino80)	0.154	0.918	0.679	0.321	0.064	0.167
ISW2 (Isw2)	0.137	1.252	0.576	0.424	0.063	0.108
CHD1 (Chd1)	0.144	1.19	0.699	0.301	0.043	0.133
ISW1a/b (Isw1)	0.144	1.081	0.73	0.27	0.047	0.167
ISW1a (Ioc3)	0.121	0.994	0.637	0.363	0.073	0.146
ISW1b (Ioc4)	0.126	0.776	0.74	0.26	0.047	0.156
