# Supplementary material for: Single-molecule imaging of chromatin remodelers reveals role of ATPase in promoting fast kinetics of target search and dissociation from chromatin
Source: eLife. 2021 Jul 27;10:e69387. doi: 10.7554/eLife.69387 (PMC8352589; doi:10.7554/eLife.69387)
Supplement: Figure 4—source data 1. [file elife-69387-fig4-data1.xlsx]

## Sheet: Sheet1
Figure 4-source data 1. Kinetic parameters determined by slow-tracking
Remodeler	Ksb (s-1)	Ktb (s-1)	Corrected τsb (s)	Corrected τtb (s)	fsb (%)	ftb (%)
RSC (Sth1)	0.436 ± 0.028	2.075 ± 0.172	4.96 ± 0.71	0.54 ± 0.06	27.1 ± 1.8	72.9 ± 1.8
SWI/SNF (Snf2)	0.461 ± 0.063	1.696 ± 0.220	4.41 ± 1.24	0.68 ± 0.08	24.4 ± 5.5	75.6 ± 5.5
INO80 (Ino80)	0.507 ± 0.058	2.041 ± 0.190	3.67 ± 0.79	0.55 ± 0.06	20.0 ± 3.3	80.0 ± 3.3
ISW2 (Isw2)	0.438 ± 0.089	2.515 ± 0.392	4.92 ± 2.16	0.44 ± 0.08	13.4 ± 2.5	86.6 ± 2.5
CHD1 (Chd1)	0.373 ± 0.062	1.830 ± 0.162	7.24 ± 3.26	0.63 ± 0.06	14.5 ± 2.9	85.5 ± 2.9
ISW1a/b (Isw1)	0.415 ± 0.043	2.174 ± 0.194	5.55 ± 1.35	0.52 ± 0.05	18.7 ± 2.1	81.3 ± 2.1
ISW1a (Ioc3)	0.695 ± 0.202	3.578 ± 1.154	2.17 ± 0.95	0.30 ± 0.1	14.1 ± 4.0	85.9 ± 4.0
ISW1b (Ioc4)	0.404 ± 0.073	1.813 ± 0.207	5.90 ± 2.55	0.63 ± 0.07	17.5 ± 4.1	82.5 ± 4.1
