# Supplementary material for: Single-molecule imaging of chromatin remodelers reveals role of ATPase in promoting fast kinetics of target search and dissociation from chromatin
Source: eLife. 2021 Jul 27;10:e69387. doi: 10.7554/eLife.69387 (PMC8352589; doi:10.7554/eLife.69387)
Supplement: Figure 5—source data 1. [file elife-69387-fig5-data1.xlsx]

## Sheet: Sheet1
Figure 5-source data 1. Slow-tracking for ATPase-dead mutants
Remodeler	Ksb (s-1)	Ktb (s-1)	Corrected τsb (s)	Corrected τtb (s)	fsb (%)	ftb (%)
ISW2K215R	0.338 ± 0.032	2.481 ± 0.519	9.68 ± 3.08	0.45 ± 0.10	32.0 ± 2.9	68.0 ± 2.9
ISW1K227R	0.345 ± 0.044	2.171 ± 0.287	9.06 ± 3.64	0.52 ± 0.08	21.3 ± 2.3	21.3 ± 2.3
CHD1K407R	0.254 ± 0.020	2.275 ± 0.490	~52	0.49 ± 0.12	21.9 ± 1.6	78.1 ± 1.6
CHD1D513N	0.297 ± 0.027	2.513 ± 0.156	16.08 ± 7.30	0.44 ± 0.03	12.7 ± 1.0	87.3 ± 1.0
ISW2D312N	0.337 ± 0.038	2.817 ± 0.158	9.77 ± 3.69	0.39 ± 0.02	9.1 ± 1.1	90.9 ± 1.1
