# Supplementary material for: Single-molecule imaging of chromatin remodelers reveals role of ATPase in promoting fast kinetics of target search and dissociation from chromatin
Source: eLife. 2021 Jul 27;10:e69387. doi: 10.7554/eLife.69387 (PMC8352589; doi:10.7554/eLife.69387)
Supplement: Figure 6—source data 1. [file elife-69387-fig6-data1.xlsx]

## Sheet: Figure 6A - source data
dt	H2B			STH1-Halo			SNF2-Halo			INO80-Halo			ISW2-Halo			CHD1-Halo			ISW1-Halo
	Mean	SEM	N	Mean	SEM	N	Mean	SEM	N	Mean	SEM	N	Mean	SEM	N	Mean	SEM	N	Mean	SEM	N
1	0.00360471	2.39555e-05	5320	0.00595003	3.3072e-05	5073	0.00567729	4.48628e-05	2159	0.00660563	6.02305e-05	1719	0.00584898	6.59983e-05	1384	0.00624814	4.18661e-05	3490	0.00622734	3.89713e-05	4103
2	0.00517748	3.87577e-05	5320	0.00837039	6.04888e-05	5073	0.0080495	8.97385e-05	2159	0.00950707	0.000125034	1719	0.00801303	0.000119924	1384	0.00833617	7.30778e-05	3490	0.00869557	7.20335e-05	4103
3	0.00629499	5.27807e-05	5320	0.0101513	9.25192e-05	5073	0.0099097	0.000145628	2159	0.0117255	0.000207363	1719	0.00968733	0.000186195	1384	0.00978367	0.000110909	3490	0.0105967	0.000116184	4103
4	0.00731725	6.78629e-05	5320	0.0123182	0.000126139	5073	0.012253	0.000205111	2159	0.0145964	0.000298341	1719	0.0119982	0.000272691	1384	0.0119451	0.000153843	3490	0.013052	0.000164119	4103
5	0.00801729	8.44783e-05	5320	0.0134266	0.000164751	5073	0.0135067	0.000277223	2159	0.0162201	0.000401486	1719	0.0129627	0.000361686	1384	0.0127511	0.000200546	3490	0.0141395	0.000218451	4103
6	0.00889601	0.000103439	5320	0.0149239	0.000208353	5073	0.0155336	0.000358498	2159	0.0185788	0.000489994	1719	0.014617	0.000452251	1384	0.0142766	0.000249219	3490	0.0161831	0.000284531	4103
7	0.00960264	0.000122652	4744	0.0163777	0.000258777	4392	0.0171919	0.000456487	1861	0.0204129	0.000604812	1468	0.0152416	0.000478516	1151	0.015465	0.00030349	2981	0.0172559	0.000344939	3535
8	0.0100877	0.000144029	4251	0.0168515	0.000294349	3879	0.0175654	0.000538329	1650	0.0210651	0.000730839	1275	0.0157401	0.000594309	1010	0.0150969	0.000329881	2639	0.0177932	0.000409349	3127
9	0.0106458	0.000165167	3839	0.0184919	0.000341733	3438	0.0189748	0.000630894	1476	0.021552	0.000754054	1118	0.0164319	0.000616085	888	0.0162291	0.000361487	2344	0.0189736	0.000417078	2778
10	0.0110538	0.000191693	3476	0.0192623	0.000386948	3078	0.0198432	0.000736496	1317	0.0218413	0.000765243	999	0.0171404	0.000734491	772	0.0163918	0.000402851	2118	0.0199523	0.000485811	2479
11	0.0115215	0.000225111	3145	0.0196907	0.000416079	2816	0.0201818	0.000779088	1180	0.0225537	0.000876573	899	0.0175114	0.000849752	704	0.0167594	0.000460431	1938	0.0204305	0.00051027	2273
12	0.0118202	0.000236866	2870	0.0208858	0.000441492	2556	0.0215915	0.000835807	1076	0.0239993	0.00101722	813	0.018425	0.000947322	638	0.0182281	0.000531587	1755	0.0219588	0.000584016	2081
13	0.0122115	0.000270399	2640	0.021409	0.000499297	2324	0.0223144	0.000959919	990	0.0253959	0.00121199	739	0.0186775	0.00117063	583	0.0179213	0.000602221	1604	0.0217341	0.000583507	1913
14	0.0128325	0.000313783	2440	0.0222588	0.000561893	2134	0.0234123	0.000975132	919	0.0269168	0.0013807	668	0.0190275	0.00112645	530	0.0185086	0.000677341	1476	0.0231915	0.000664504	1764
15	0.0134729	0.000360335	2262	0.0235981	0.000628355	1968	0.0244213	0.00105893	836	0.0278176	0.00146132	620	0.0192102	0.00127289	491	0.0193916	0.00067177	1368	0.0242634	0.000726485	1641
Dunnett's multiple comparisons test	Summary	Adjusted P Value
H2B vs. STH1	**	0.0018
H2B vs. SNF2	***	0.0008
H2B vs. INO80	****	<0.0001
H2B vs. ISW2	*	0.0254
H2B vs. CHD1	*	0.0349
H2B vs. ISW1	***	0.0005

## Sheet: Figure6B - source data
	Halo-H2B	STH1-Halo	SNF2-Halo	INO80-Halo	ISW2-Halo	CHD1-Halo	ISW1-Halo
Number of molecules (N)	2634	2492	1030	818	633	1472	1885
Minimum	-2.842	-2.545	-2.296	-2.433	-2.26	-2.44	-2.213
25% Percentile	-1.69	-1.467	-1.458	-1.406	-1.509	-1.502	-1.457
Median	-1.465	-1.25	-1.206	-1.126	-1.27	-1.271	-1.214
75% Percentile	-1.246	-0.9827	-0.9238	-0.7901	-0.9253	-0.9543	-0.9426
Maximum	-0.1246	0.001149	-0.009598	0.2005	0.1175	0.0732	0.1146
Range	2.717	2.546	2.287	2.634	2.377	2.513	2.327
Dunnett's multiple comparisons test	Summary	Adjusted P Value
H2B vs. STH1	****	<0.0001
H2B vs. SNF2	****	<0.0001
H2B vs. INO80	****	<0.0001
H2B vs. ISW2	****	<0.0001
H2B vs. CHD1	****	<0.0001
H2B vs. ISW1	****	<0.0001

## Sheet: Figure6C - source data
	Halo-H2B	STH1-Halo	SNF2-Halo	INO80-Halo	ISW2-Halo	CHD1-Halo	ISW1-Halo
Number of molecules (N)	1214	1067	599	708	196	793	765
Minimum	-4.056	-3.561	-3.469	-3.682	-3.456	-3.319	-3.556
25% Percentile	-2.661	-2.189	-2.158	-2.099	-2.403	-2.396	-2.303
Median	-2.395	-1.855	-1.816	-1.744	-2.044	-2.107	-1.921
75% Percentile	-2.141	-1.561	-1.496	-1.467	-1.64	-1.746	-1.608
Maximum	-0.9356	-0.6474	-0.762	-0.731	-0.8382	-0.6512	-0.6587
Range	3.12	2.913	2.707	2.951	2.618	2.668	2.897
Dunnett's multiple comparisons test	Summary	Adjusted P Value
H2B vs. STH1	****	<0.0001
H2B vs. SNF2	****	<0.0001
H2B vs. INO80	****	<0.0001
H2B vs. ISW2	****	<0.0001
H2B vs. CHD1	****	<0.0001
H2B vs. ISW1	****	<0.0001

## Sheet: Figure6D -source data
dt	H2B			ISW2WT			ISW2K215R			ISW2D312N
	Mean	SEM	N	Mean	SEM	N	Mean	SEM	N	Mean	SEM	N
1	0.00854884	0.000106109	2108	0.0134232	0.00057567	288	0.00815068	0.000314095	462	0.0123887	0.000513341	357
2	0.0147043	0.000221637	2108	0.02547	0.0013305	288	0.0149615	0.000759429	462	0.0232265	0.00121188	357
3	0.0193349	0.000348615	2108	0.0366663	0.00233778	288	0.0201014	0.00123399	462	0.0320275	0.00194114	357
4	0.0234022	0.000489639	2108	0.0488662	0.00362579	288	0.0246887	0.0018114	462	0.0398824	0.00270527	357
5	0.0269169	0.000651257	2108	0.0601228	0.00483314	288	0.02896	0.0021595	462	0.04777	0.00326464	357
6	0.0301651	0.000855343	2108	0.0685841	0.00570136	288	0.0328375	0.00239907	462	0.0554043	0.0038497	357
7	0.0327498	0.00104828	1897	0.060211	0.00545851	223	0.0328368	0.00218987	403	0.0574422	0.00460935	282
8	0.0350038	0.00123422	1727	0.0668728	0.00727918	183	0.0321992	0.00178468	368	0.0586773	0.00565947	244
9	0.0373981	0.00150946	1565	0.0654546	0.00697659	152	0.0338674	0.00210149	334	0.0552092	0.00587249	211
10	0.040019	0.00168213	1425	0.0671369	0.00722504	131	0.0369554	0.00277756	294	0.0526191	0.004827	187
11	0.0401226	0.00136023	1306	0.0620178	0.00596397	111	0.0415438	0.00370097	271	0.0567434	0.00565873	171
12	0.0424129	0.00140534	1228	0.0593358	0.00655402	90	0.0435196	0.00339773	240	0.0600263	0.00728059	156
13	0.0444416	0.0014919	1141	0.0603971	0.00777357	75	0.0482308	0.0041639	221	0.0624256	0.00835331	137
14	0.0464112	0.0015707	1079	0.0635887	0.00925371	66	0.0462864	0.00440072	200	0.0613018	0.00892023	127
15	0.0471249	0.00159058	1005	0.0649208	0.0102661	62	0.0467147	0.00465315	181	0.0582615	0.00620732	109
16	0.0493905	0.00168566	942	0.0669035	0.0114134	58	0.044507	0.00470853	168	0.0598722	0.00740925	96
17	0.0517701	0.00189561	893	0.0631023	0.0120946	55	0.0491863	0.00593013	149	0.0661065	0.01026	93
18	0.0538278	0.00210597	834	0.0657864	0.0146337	52	0.0501489	0.00657262	135	0.0636569	0.00885454	84
19	0.0557129	0.00233478	796	0.0707054	0.0159818	49	0.0497689	0.00680264	125	0.0670859	0.0100598	80
20	0.0578115	0.00222865	753	0.0584494	0.00958235	46	0.0521703	0.0075314	115	0.0739919	0.0120401	73
Unpaired t test with Welch's correction	Summary	P Value
ISW2 vs. ISW2K215R	****	<0.0001
ISW2 vs. ISW2D312N	ns	0.8381

## Sheet: Figure6E - source data
dt	H2B			ISW1WT			ISW1K227R
	Mean	SEM	N	Mean	SEM	N	Mean	SEM	N
1	0.00854884	0.000106109	2108	0.0148436	0.000279449	1085	0.0115051	0.000517153	472
2	0.0147043	0.000221637	2108	0.0281591	0.000642892	1085	0.0214131	0.0011956	472
3	0.0193349	0.000348615	2108	0.0393035	0.0010374	1085	0.0296074	0.00177782	472
4	0.0234022	0.000489639	2108	0.0493783	0.00148289	1085	0.036709	0.00236379	472
5	0.0269169	0.000651257	2108	0.0586659	0.00191138	1085	0.04352	0.00318407	472
6	0.0301651	0.000855343	2108	0.069132	0.00246147	1085	0.0468912	0.00350575	472
7	0.0327498	0.00104828	1897	0.0736075	0.00300051	872	0.0467516	0.0034823	391
8	0.0350038	0.00123422	1727	0.0795395	0.00371882	739	0.0513121	0.0041262	332
9	0.0373981	0.00150946	1565	0.0870113	0.00473337	629	0.0507143	0.00421885	286
10	0.040019	0.00168213	1425	0.0878956	0.00510638	539	0.0513206	0.0046475	250
11	0.0401226	0.00136023	1306	0.0879045	0.00586217	452	0.0479982	0.00487755	225
12	0.0424129	0.00140534	1228	0.0873775	0.00586375	389	0.0524955	0.00575454	204
13	0.0444416	0.0014919	1141	0.0891301	0.00623258	333	0.0563196	0.00701089	181
14	0.0464112	0.0015707	1079	0.08466	0.00615562	302	0.0629805	0.00909648	159
15	0.0471249	0.00159058	1005	0.0909152	0.00725015	257	0.0698279	0.0105246	140
16	0.0493905	0.00168566	942	0.0918509	0.00813493	231	0.0617867	0.00811284	125
17	0.0517701	0.00189561	893	0.0965734	0.00968208	213	0.0615061	0.00865415	116
18	0.0538278	0.00210597	834	0.0929689	0.00991664	194	0.0625981	0.00939856	104
19	0.0557129	0.00233478	796	0.0934462	0.0109412	180	0.0637384	0.0101185	97
20	0.0578115	0.00222865	753	0.0980883	0.0110777	171	0.0681195	0.0120625	88
Unpaired t test with Welch's correction	Summary	P Value
ISW1 vs. ISW1K227R	****	<0.0001

## Sheet: Figure6F - source data
dt	H2B			WTCHD1			CHD1K407R			CHD1D513N
	Mean	SEM	N	Mean	SEM	N	Mean	SEM	N	Mean	SEM	N
1	0.00854884	0.000106109	2108	0.0131494	0.000223551	1216	0.00916295	0.000310511	589	0.0125357	0.000462502	418
2	0.0147043	0.000221637	2108	0.0241465	0.000520281	1216	0.016123	0.000630322	589	0.0233167	0.00098989	418
3	0.0193349	0.000348615	2108	0.0333248	0.000871144	1216	0.0214225	0.000953292	589	0.0315281	0.00148721	418
4	0.0234022	0.000489639	2108	0.0414527	0.0012554	1216	0.0260921	0.00131519	589	0.039191	0.00207089	418
5	0.0269169	0.000651257	2108	0.0494107	0.00164285	1216	0.0305449	0.00174414	589	0.0471119	0.0027347	418
6	0.0301651	0.000855343	2108	0.0570247	0.00203946	1216	0.0349464	0.00229128	589	0.0548999	0.00368084	418
7	0.0327498	0.00104828	1897	0.0618756	0.0021798	981	0.0378103	0.00251747	515	0.0568814	0.00459033	337
8	0.0350038	0.00123422	1727	0.0672831	0.00265969	816	0.0384946	0.00257621	450	0.058906	0.00527339	286
9	0.0373981	0.00150946	1565	0.0683083	0.00287793	671	0.0390117	0.0028307	395	0.0582336	0.0055552	252
10	0.040019	0.00168213	1425	0.0718627	0.00330778	560	0.0389677	0.00334624	354	0.0592308	0.0058116	223
11	0.0401226	0.00136023	1306	0.0748901	0.00376167	482	0.0382611	0.00331338	327	0.0634847	0.00643249	204
12	0.0424129	0.00140534	1228	0.0777654	0.004529	402	0.0418438	0.00378365	308	0.0625445	0.00678831	178
13	0.0444416	0.0014919	1141	0.077819	0.0050255	350	0.0433217	0.00477195	276	0.0602014	0.00589709	161
14	0.0464112	0.0015707	1079	0.075418	0.00505689	313	0.0404837	0.0029936	253	0.0623223	0.00665056	150
15	0.0471249	0.00159058	1005	0.0782935	0.00564533	280	0.041951	0.00336559	243	0.0664362	0.00757243	133
16	0.0493905	0.00168566	942	0.0787631	0.00619414	252	0.0414382	0.00346215	231	0.0637529	0.00793502	120
17	0.0517701	0.00189561	893	0.0814315	0.00736835	223	0.041229	0.00344665	218	0.0678931	0.00891568	113
18	0.0538278	0.00210597	834	0.0854382	0.00721284	200	0.0410731	0.00326402	205	0.06999	0.0101482	107
19	0.0557129	0.00233478	796	0.0791912	0.00718203	186	0.0395489	0.00302284	192	0.0706241	0.0110026	103
20	0.0578115	0.00222865	753	0.0777421	0.00776409	167	0.0399465	0.00307958	183	0.0667898	0.0101121	93
Unpaired t test with Welch's correction	Summary	P Value
CHD1 vs. CHD1K407R	****	<0.0001
CHD1 vs. CHD1D513N	ns	0.1604

## Sheet: Figure6G - source data
	Halo-H2B	ISW2-Halo	ISW2K215R-Halo	ISW1-Halo	ISW1K227R-Halo	CHD1WT	CHD1K407R-Halo
Number of molecules (N)	1214	196	295	765	288	793	352
Minimum	-4.056	-3.456	-4.217	-3.556	-4.238	-3.319	-4.961
25% Percentile	-2.661	-2.403	-2.673	-2.303	-2.548	-2.396	-2.638
Median	-2.395	-2.044	-2.376	-1.921	-2.152	-2.107	-2.323
75% Percentile	-2.141	-1.64	-2.063	-1.608	-1.711	-1.746	-2.008
Maximum	-0.9356	-0.8382	-0.7242	-0.6587	-0.6679	-0.6512	-0.8859
Range	3.12	2.618	3.493	2.897	3.57	2.668	4.075
Unpaired t test with Welch's correction	Summary	P Value
ISW2 vs. ISW2K215R	****	<0.0001
ISW1 vs. ISW1K227R	****	<0.0001
CHD1 vs. CHD1K407R	****	<0.0001

## Sheet: Figure6H -source data
	Halo-H2B	ISW2-Halo	ISW2D312N-Halo	CHD1-Halo	CHD1D513N-Halo
Number of molecules (N)	1214	196	252	793	296
Minimum	-4.056	-3.456	-3.633	-3.319	-3.411
25% Percentile	-2.661	-2.403	-2.496	-2.396	-2.509
Median	-2.395	-2.044	-2.124	-2.107	-2.127
75% Percentile	-2.141	-1.64	-1.742	-1.746	-1.73
Maximum	-0.9356	-0.8382	-0.911	-0.6512	-0.7843
Range	3.12	2.618	2.722	2.668	2.627
Unpaired t test with Welch's correction	Summary	P Value
ISW2 vs. ISW2D312N	ns	0.0846
CHD1 vs. CHD1D513N	ns	0.4142
