# Supplementary material for: Single-molecule imaging of chromatin remodelers reveals role of ATPase in promoting fast kinetics of target search and dissociation from chromatin
Source: eLife. 2021 Jul 27;10:e69387. doi: 10.7554/eLife.69387 (PMC8352589; doi:10.7554/eLife.69387)
Supplement: Supplementary file 1. [file elife-69387-supp1.xlsx]

## Sheet: Strains used
Strain	Genotype	Fig.	Source
W1588-4C	MATa can1-100 his3-11,15 leu2-3,112 trp1-1 ura3-1 RAD5+		Tsukiyama lab
Sth1-Halo	MATa can1-100 his3-11,15 leu2-3,112 trp1-1 ura3-1 RAD5+ ADE2+ pdr5::loxP STH1-Halo-NatMX	1	This work
Snf2-Halo	MATa can1-100 his3-11,15 leu2-3,112 trp1-1 ura3-1 RAD5+ ADE2+ pdr5::loxP SNF2-Halo-NatMX	1	This work
Ino80-Halo	MATa can1-100 his3-11,15 leu2-3,112 trp1-1 ura3-1 RAD5+ ADE2+ pdr5::loxP INO80-Halo-NatMX	1	This work
Isw2-Halo	MATa can1-100 his3-11,15 leu2-3,112 trp1-1 ura3-1 RAD5+ ADE2+ pdr5::loxP ISW2-Halo-NatMX	1	This work
Chd1-Halo	MATa can1-100 his3-11,15 leu2-3,112 trp1-1 ura3-1 RAD5+ ADE2+ pdr5::loxP CHD1-Halo-NatMX	2	This work
Isw1-Halo	MATa can1-100 his3-11,15 leu2-3,112 trp1-1 ura3-1 RAD5+ ADE2+ pdr5::loxP ISW1-Halo-NatMX	2	This work
Ioc3-Halo	MATa can1-100 his3-11,15 leu2-3,112 trp1-1 ura3-1 RAD5+ ADE2+ pdr5::loxP IOC3-Halo-NatMX	2	This work
Ioc4-Halo	MATa can1-100 his3-11,15 leu2-3,112 trp1-1 ura3-1 RAD5+ ADE2+ pdr5::loxP IOC4-Halo-NatMX	2	This work
Halo-H2B	MATa (hta1-htb1)∆::LEU2, (hta2-htb2)∆::TRP1, his3∆200 leu2∆1 ura3-52 trp1∆63 lys2-128∆ <pJH55 (HTA1-Halo-HTB1-HIS3)	3	Ranjan et al., 2020
Free Halo	MATa tor1-1 fpr1::loxP-LEU2-loxP RPL13A- 2xFKBP12::loxP pdr5::loxP Swc5-FRB-GFP KanMx <pRS416-NLS-Halo	3	Ranjan et al., 2020
Isw2-K215R-Halo	MATa can1-100 his3-11,15 leu2-3,112 trp1-1 ura3-1 RAD5+ ADE2+ pdr5::loxP ISW2K215R-Halo-NatMX	5	This work
Chd1-D513N-Halo	MATa can1-100 his3-11,15 leu2-3,112 trp1-1 ura3-1 RAD5+ ADE2+ pdr5::loxP CHD1D513N-Halo-NatMX	5	This work
Isw1-K227R-Halo	MATa can1-100 his3-11,15 leu2-3,112 trp1-1 ura3-1 RAD5+ ADE2+ pdr5::loxP ISW1K227R-Halo-NatMX	5	This work
Chd1-R1016A/ K1020A/R1255A-Halo	MATa can1-100 his3-11,15 leu2-3,112 trp1-1 ura3-1 RAD5+ ADE2+ pdr5::loxP CHD1R1016A/K1020A/ R1255A-Halo-NatMX	S7	This work
