# Supplementary material for: Single-molecule imaging of chromatin remodelers reveals role of ATPase in promoting fast kinetics of target search and dissociation from chromatin
Source: eLife. 2021 Jul 27;10:e69387. doi: 10.7554/eLife.69387 (PMC8352589; doi:10.7554/eLife.69387)
Supplement: Supplementary file 2. [file elife-69387-supp2.xlsx]

## Sheet: Sheet1
Primer Name & Description	Sequence
For Sth1-Halo (Forward)	CTGACAAGTTAAATGAGTTTACTGATGAATGGTTCAAGGAACACTCTTCG AGGGAACAAAAGCTGGAG
For Sth1-Halo (Reverse)	CGGCACTAATAAGCCCAGAGAATAAGCCAAAGGATATTAGTTACTCAAAG CTATAGGGCGAATTGGGT
For Snf2-Halo (Forward)	CTGAATCTTTCACAGATGAAGCGGACTCGAGCATGACAGAAGCGAGTGTA AGGGAACAAAAGCTGGAG
For Snf2-Halo (Reverse)	TGTTTGTCTACGTATAAACGAATAAGTACTTATATTGCTTTAGGAAGGTA CTATAGGGCGAATTGGGT
For Ino80-Halo (Forward)	GCAAAAGCATAAGTCAAGATGGAATTAAGGAAGCGGCAAGTGCATTGGCA AGGGAACAAAAGCTGGAG
For Ino80-Halo (Reverse)	GATAGACATTAACTCCGCTTAATGTAAATAACACAATATGAATACCTTTT CTATAGGGCGAATTGGGT
For Isw2-Halo (Forward)	AAGATACAAACGATCATGTTGATAAAAGAACCAAAATTGATCAAGAAGCA AGGGAACAAAAGCTGGAG
For Isw2-Halo (Reverse)	ATAAAAAATTATATCTCTCACGTCACTTATTTTAATGCACAATACATGAT CTATAGGGCGAATTGGGT
For Isw1-Halo (Forward)	GAACTGAACAGTTGGTAGCAGAGAAAATTCCGGAAAACGAAACCACTCAT AGGGAACAAAAGCTGGAG
For Isw1-Halo (Reverse)	ATTTATAGATTAGTATGATTATATATTTTTCTTCAGAAGCATGGTGTAGG CTATAGGGCGAATTGGGT
For Chd1-Halo (Forward)	GTACAAAGCTGATGGCAATGTACGACAAGATAACAGAGTCTCAAAAGAAG AGGGAACAAAAGCTGGAG
For Chd1-Halo (Reverse)	AATTAAGCATTATTACTTTACGGTGCCCTATAGTACACACACTTACACGC CTATAGGGCGAATTGGGT
For Ioc3-Halo (Forward)	ACGACAATGATTCTTCTTTTGATGATGGTAGAGTTAAAAGGCAGCGCACT AGGGAACAAAAGCTGGAG
For Ioc3-Halo (Reverse)	GCAGCCTGTAAGGAGTTTCACAATCTTCACGTTCGTTGAAAGCTAGTTGT CTATAGGGCGAATTGGGT
For Ioc4-Halo (Forward)	AGCCGAGCTTTAGTGAAGACGTAAAGGAAGAAGAAAGCAAAGTAGGAGCA AGGGAACAAAAGCTGGAG
For Ioc4-Halo (Reverse)	TTCCCCTCTATTGTTCAAAAGCAGAGTACATCAACTGCAATAGCAACAGG CTATAGGGCGAATTGGGT
For Isw2K215R-Halo (Forward) using 50:50 Method (Horecka and Davis, 2014)	GCACGAAAACAAACTATCTGGTATCTTGGCCGATGAAATGGGGCTGGGTAGAACCTTACAAACAATTTCATTCCTAGGTTATTTGAGATACGTCAAACAAAcccaatacaacagatcacg
For Isw2K215R-Halo (Reverse) using 50:50 Method (Horecka and Davis, 2014)	TTTGTTTGACGTATCTCAAATAACCTAGGAATGAAATTGTTTGTAAGGTTaagcgacaagaagagatagacc
For Isw1K227R-Halo (Forward) using pUG72	TGCATAAGAACAAAATAGCGGGTATCCTTGCTGATGAAATGGGTTTAGGTcagctgaagcttcgtacgc
For Isw1K227R-Halo (Reverse) using pUG72	ATTTTTTCAATGTACCTAAGATATCCCAGAAATGAAATAGTTTGCAGGGTgcataggccactagtggatctg
For Chd1D513N-Halo (Forward) using 50:50 Method (Horecka and Davis, 2014)	TAAAGGATCGTGCTGAATTAGGAAGTATAAAATGGCAATTTATGGCCGTTAACGAAGCTCATAGACTAAAAAATGCTGAATCATCCCTTTATGAATCATTAaagcgacaagaagagatagacc
For Chd1D513N-Halo (Reverse) using 50:50 Method (Horecka and Davis, 2014)	TAATGATTCATAAAGGGATGATTCAGCATTTTTTAGTCTATGAGCTTCGTcccaatacaacagatcacg
For Chd1R1016A/K1020A/R1255A-Halo (Forward) using pUG72	GACCGCCGCAAACTCAGATTCTGACGACGATAGTACTTCCAGATCTTCTAcagctgaagcttcgtacgc
For Chd1R1016A/K1020A/R1255A-Halo (Reverse) using pUG72	TTTTGGAAGGACCAGTAGGGAGTTTTTTCGAGCCTATGTCAGCACTGGGAgcataggccactagtggatctg
